1 **Respiratory Syncytial virus NS1 protein targets the transactivator binding**  
2 **domain of MED25.**

3 **Running title: RSV NS1 targets MED25 ACID**

4  
5 Vincent Basse<sup>a&</sup>, Jiawei Dong<sup>b&</sup>, Andressa Peres de Oliveira<sup>c</sup>, Pierre-Olivier  
6 Vidalain<sup>c,d</sup>, Frederic Tangy<sup>c</sup>, Marie Galloux<sup>a</sup>, Jean-Francois Eleouet<sup>a</sup>, Christina  
7 Sizun<sup>b\*</sup>, Monika Bajorek<sup>a\*</sup>

8  
9 <sup>a</sup>Université Paris-Saclay, INRAE, UVSQ, VIM, 78350 Jouy-en-Josas, France.

10 <sup>b</sup>Institut de Chimie des Substances Naturelles, CNRS UPR 2301, Université Paris-  
11 Saclay, 1 Avenue de la Terrasse, 91190 Gif-sur-Yvette, France.

12 <sup>c</sup>Unité de Génomique Virale et Vaccination, Institut Pasteur, CNRS UMR 3569, 75015  
13 Paris, France.

14 <sup>d</sup> CIRI, Centre International de Recherche en Infectiologie, Univ Lyon, Inserm U1111,  
15 Université Claude Bernard Lyon 1, CNRS, UMR5308, ENS de Lyon, 69007, Lyon,  
16 France.

17 \* Corresponding authors, & Co-first authors

18 ORCID:

19 Monika Bajorek 0000-0002-0160-4709

20 Christina Sizun 0000-0002-5760-2614

21

22

23 **Abstract**

24 Respiratory syncytial virus has evolved a unique strategy to evade host immune response by  
25 coding for two non-structural proteins NS1 and NS2. Recently it was shown that in infected  
26 cells, nuclear NS1 could be involved in transcription regulation of host genes linked to innate  
27 immune response, via an interaction with chromatin and the Mediator complex. Here we  
28 identified the MED25 Mediator subunit as an NS1 interactor in a yeast two-hybrid screen. We  
29 demonstrate that NS1 directly interacts with MED25 *in vitro* and *in cellula*, and that this  
30 interaction involves the C-terminal  $\alpha 3$  helix of NS1 and the MED25 ACID domain. More  
31 specifically we showed by NMR that the NS1  $\alpha 3$  sequence primarily binds to the MED25 ACID  
32 H2 face, which is a transactivation domain (TAD) binding site for transcription regulators such  
33 as ATF6 $\alpha$ , a master regulator of ER stress response activated upon viral infection. Moreover,  
34 we found out that the NS1  $\alpha 3$  helix could compete with ATF6 $\alpha$  TAD binding to MED25. This  
35 finding points to a mechanism of NS1 interfering with innate immune response by impairing  
36 recruitment by cellular TADs of the Mediator via MED25 and hence transcription of specific  
37 genes by RNA polymerase II.

38

39 **Importance**

40 Human RSV is the leading cause of infantile bronchiolitis in the world and one of the major  
41 causes of childhood deaths in resource-poor settings. It is a major unmet target for vaccines  
42 and anti-viral drugs. RSV non-structural protein NS1 is known to antagonize the cellular  
43 immune response and was recently shown to be involved in transcription regulation of infected  
44 cells. However, the exact mechanism of this regulation is not well defined. Here we show that  
45 nuclear NS1 interacts directly with the Mediator subunit MED25 and is able to compete with a  
46 cellular transcription activator, which is activated during viral infection. We hypothesize that  
47 this interaction may underlie regulation of the expression of genes involved in the innate  
48 immune response.

49

## 50 Introduction

51 Human RSV (hRSV) is the most frequent cause of infantile bronchiolitis and pneumonia  
52 worldwide (1). In 2005 it was estimated to have caused ~34 million acute respiratory infections  
53 in children younger than 5 years and 60,000-199,000 childhood deaths worldwide (2). Severe  
54 RSV infection is a major reason for child hospitalization. The importance of RSV-associated  
55 pulmonary disease and mortality in elderly persons has also been recognized (3). Similarly,  
56 bovine RSV (bRSV) affects cattle farms and leads to economic loss due to high morbidity and  
57 mortality among calves (4, 5). Importantly, there is still no licensed vaccine for human RSV  
58 despite over six decades of attempts (6), emphasizing the need for a better understanding of  
59 RSV pathogenesis, and more particularly the mechanisms that were developed by the virus  
60 to evade host innate immune responses.

61

62 The pathology associated with RSV infection results from both viral replication and the host  
63 immune response mediated first by the production of type I interferons (IFN-I), which induces  
64 the transcription of IFN-stimulating genes (ISG) and the production of proinflammatory  
65 mediators (7, 8). However, upon infection by RSV, IFN levels remain surprisingly low. This  
66 poor induction of IFN is attributed at least in part to the two RSV non-structural proteins, NS1  
67 and NS2. NS1 and NS2 are unique to the *Orthopneumovirus* genus of the *Pneumoviridae*  
68 family. They diverge among the different viruses of this genus and appear to contribute to  
69 host-range restrictions (5, 9, 10). Both NS1 and NS2 also act as IFN antagonists, and many  
70 of their cytosolic targets have been identified (11, 12). As an example, NS1 inhibits RIG-I  
71 activity by interacting with MAVS as well as with TRIM25, the E3 ligase of RIG-I (13, 14). NS1  
72 and NS2 were localized to the mitochondria (15), where they form a viral degradasome,  
73 leading to degradation of multiple target proteins, notably involved in type I IFN pathway (11).  
74 NS1 was found in the cytosol as well as in the nucleus, where it is expected to interfere with  
75 host gene expression (15, 16). In a very recent publication, NS1 was shown to associate with  
76 chromatin in promotor and enhancer regions of genes related to innate immune response to  
77 viral infection (16). By targeting these DNA regulatory regions, NS1 was suggested to

78 suppress transcription of these genes, thus antagonizing the immune response (16). However,  
79 the exact molecular mechanism of this suppression is not well defined yet. Further study of  
80 NS1 interaction with nuclear host factors will enable a better understanding of how RSV  
81 modulates host transcription.

82 Based on comparison of X-ray crystallographic structures, hRSV NS1 was proposed to be a  
83 structural paralog of the hRSV matrix (M) protein (17-19). NS1 displays striking structural  
84 similarity with the N-terminal domain of the M protein, as both contain a 7-stranded  $\beta$ -sandwich  
85 clamped by an  $\alpha$ -helix. In contrast to M, NS1 lacks a similar C-terminal domain but contains  
86 an additional C-terminal  $\alpha$ -helix,  $\alpha$ 3 (Fig. 1A). NS1  $\alpha$ 3 helix was specifically shown to be  
87 involved in the modulation of host responses (18). Mutations in the NS1  $\alpha$ 3 helix negatively  
88 affected the transcriptional regulation of genes involved in key signalling pathways such as  
89 IFN induction and oxidative stress, resulting in 2-fold reduction of RSV replication (18).

90

91 Two different interactome studies of RSV NS1 pointed to an interaction of NS1 with the  
92 Mediator complex (16, 20). The Mediator complex is a nuclear multi-subunit complex that is  
93 part of the preinitiation complex required for RNA polymerase II transcription, and is a known  
94 regulator of many innate immune response genes (21-23). Several Mediator subunits were  
95 identified as potential interactors of NS1, among which MED25 (16, 20). MED25 was shown  
96 to be targeted by viral activator proteins, such as Herpes simplex virus transactivator protein  
97 VP16, which activates viral immediate-early genes during infection (24, 25). MED25 contains  
98 two folded domains: the N-terminal von Willebrand domain (residues 15-216, VWD) and the  
99 central Activator Interacting Domain (residues 392-543, ACID) (Fig. 1B). The interdomain and  
100 C-terminal regions are likely highly disordered. The ACID structure was solved by NMR and  
101 shown to be the target of both transactivation domains (TADs) of VP16 (24, 26, 27). A cryo-  
102 EM structure of the entire mammalian Mediator complex confirmed the location of MED25 in  
103 the tail module, with VWD well integrated in the tail (28) and ACID extending outside of the  
104 complex.

105

106 The putative interaction between NS1 and Mediator complex suggested by interactome  
107 studies has not been investigated so far. Having identified MED25 as an NS1 interactor in a  
108 yeast two-hybrid screen, we investigated this interaction in more details. We demonstrated  
109 that NS1  $\alpha 3$  helix directly interacts with the MED25 ACID domain in cells and *in vitro*, and that  
110 the residues found to be critical for innate immune response gene regulation (16) are also  
111 critical for this interaction. Moreover, we found out that NS1  $\alpha 3$  targets the MED25 ACID H2-  
112 face, which is the binding site of a number of TADs of transcription regulators (26, 27, 29-31).  
113 We revealed that NS1  $\alpha 3$  could compete with the TAD of ATF6 $\alpha$ , involved in the innate  
114 immune response to viral infections. In contrast to transcription regulators like VP16, the small  
115 one-domain NS1 does not appear to have a distinct DNA-binding domain, and no specific  
116 DNA-binding region has been identified yet. Altogether, our results thus strongly suggest that  
117 NS1 could interfere with the host innate immune response by binding to MED25 and hindering  
118 the recruitment of transcription regulators to the Mediator, thus impairing transcription of  
119 specific host genes by RNA polymerase II.

120

## 121 **Results**

### 122 **Identification of MED25 as a potential interaction partner of RSV NS1 by a yeast two-** 123 **hybrid screen**

124 To identify human proteins interacting with RSV NS1, we performed a yeast two-hybrid (Y2H)  
125 screen. The RSV NS1 protein fused with the GAL4 DNA binding domain (GAL4-BD) was  
126 expressed in yeast and used as a bait against prey proteins expressed from a human spleen  
127 cDNA library and fused to the GAL4 activation domain (GAL4-AD). Fifteen potential interactors  
128 of RSV NS1 were identified. We chose to focus on the MED25 subunit of the human Mediator  
129 complex, which was one of the most abundant interactors in our screen and was also identified  
130 in a previous proteomics study of host targets interacting with RSV NS1 (16, 20). In total, 10  
131 over 156 positive yeast colonies expressed MED25. Although six of the cDNA clones  
132 expressed full-length MED25, two started at position 261 and two others at position 308. As

133 the four cDNA clones coding for a truncated MED25 version contained the ACID domain (Fig.  
134 1A), this strongly suggested a role of this domain in the interaction of MED25 with RSV NS1.

135

### 136 **NS1 interacts through its C-terminal $\alpha$ 3 helix with MED25 ACID in cells**

137 In order to confirm the NS1-MED25 interaction found by Y2H screening, we studied whether  
138 NS1 could interact with MED25 in cells. For that purpose, we used a split-luciferase  
139 complementation assay based on the NanoLuc enzyme (32). In this system, the 114 or the  
140 11S NanoLuc fragments are fused to the C or N-terminus of each protein partner. To  
141 investigate the NS1-MED25 interaction, combinations of two constructs were transfected into  
142 293T cells. Cells were lysed 24 h post transfection, luciferase substrate was added, and the  
143 luminescence, which directly depends on the interaction, was measured.

144 We used the RSV phosphoprotein (P), which is known to form tetramers (33-38), as a positive  
145 control. As shown in Fig. 2A, co-transfection of P-114 and P-11S resulted in a high  
146 luminescence signal, indicating a strong P/P interaction, as expected. We then used the NS1-  
147 NS1 interaction as an additional control. Although the predominant form of NS1 was reported  
148 to be monomeric (18), NS1 is also known to form dimers and higher order oligomers (15, 39).  
149 We therefore tested the NS1-114/NS1-11S pair and obtained a strong luminescence signal,  
150 revealing the capacity of NS1 to self-associate (Fig. 2A). We then tested the interaction  
151 between hRSV NS1 and full-length MED25 (Fig. 2A). When NS1-114 was co-expressed with  
152 11S-MED25, the luminescence signal was high, confirming the interaction in cells. We then  
153 separately tested MED25 VWD and ACID domains to identify the domain involved in NS1  
154 interaction. Transfecting NS1-114 with 11S-MED25 ACID resulted in comparable signal to that  
155 with 11S-MED25, while transfecting NS1-114 with 11S-MED25 VWD produced only  
156 background luminescence, suggesting that ACID domain was the NS1 binding domain.

157 We next asked whether the NS1 C-terminal  $\alpha$ 3 helix could be critical for the interaction with  
158 MED25 ACID. Previously, mutations in the  $\alpha$ 3 helix were shown to negatively affect  
159 transcription of key innate immune genes (18). We thus generated the same mutants: three  
160 NS1 mutants with substitutions inside the  $\alpha$ 3 helix, Y125A, L132A, and L132A/L133A, and a

161 deletion mutant  $\Delta\alpha 3$ , where the  $\alpha 3$  helix was removed. Of note, the mutants Y125A and  
162 L132A/L133A were previously shown to preserve the structural integrity of NS1 (18).  
163 Luminescence was measured in cells transfected with WT or mutant NS1-114 together with  
164 11S-MED25 ACID (Fig. 2B). NS1 L132A/MED25 ACID co-transfection resulted in  
165 luminescence signal comparable to NS1/MED25 ACID. In contrast, co-transfection of NS1  
166 Y125A, L132A/L133A or  $\Delta\alpha 3$  with MED25 ACID significantly reduced luminescence, indicating  
167 loss of interaction. All NS1 constructs were expressed in comparable amounts in cells, as  
168 assessed by Western blot using a FLAG tag (Fig. 2C). Our results with the split-NanoLuc  
169 assay thus confirmed the NS1-MED25 interaction, and allowed to identify the MED25 ACID  
170 domain and the NS1  $\alpha 3$  helix as interaction domains.

171 Last, as MED25 has been reported to localize to the nucleus (24), and since NS1 was  
172 suggested to be actively transported to the nucleus by binding another cellular or viral protein  
173 (16), we investigated whether interaction with MED25 could influence the cellular localization  
174 of NS1. BEAS-2B cells were transfected to express FLAG-NS1 WT or mutant constructs, and  
175 the localization of NS1 protein was determined by immunofluorescence imaging after staining  
176 with anti-FLAG primary antibody (Fig. 2D). Untagged NS1 was used as negative staining  
177 control. FLAG-NS1 localized to the nucleus and to the cytoplasm, as previously reported (15,  
178 16). None of the four tested NS1 mutants showed loss of nuclear localization, indicating that  
179 the NS1-MED25 interaction is not required for NS1 nuclear localization.

180

### 181 **NS1 interacts directly with MED25 ACID**

182 Next, we investigated the interaction between human NS1 and MED25 ACID *in vitro* by GST-  
183 pulldowns using recombinant proteins. GST, GST-NS1 and GST-NS1 $\alpha 3$  (residues 115-139)  
184 were co-expressed with MED25 ACID in *E.coli*. Bacteria lysates were incubated with  
185 glutathione beads, washed extensively and the bound complexes were analysed by SDS-  
186 PAGE and Coomassie blue staining. As shown in Fig. 3, MED25 ACID was pulled down by  
187 GST-NS1 as well as GST-NS1 $\alpha 3$ . Spurious binding was observed with GST without NS1.  
188 However, the relative band intensities between GST and retained MED25 ACID were

189 significantly lower than with GST-NS1 or GST-NS1 $\alpha$ 3. In conclusion, our results showed that  
190 the NS1/MED25 ACID interaction is direct and mediated by the C-terminal  $\alpha$ 3 helix of NS1.

191

## 192 **Mapping of NS1 interaction regions on MED25 ACID by NMR**

193 To map more precisely the NS1  $\alpha$ 3 helix interaction site on MED25 ACID, we performed NMR  
194 interaction experiments. We titrated  $^{15}\text{N}$ -labelled MED25 ACID by an N-terminally acetylated  
195 peptide, NS1 $\alpha$ 3, corresponding to the sequence of the NS1  $\alpha$ 3 helix. At each titration point we  
196 acquired a 2D  $^1\text{H}$ - $^{15}\text{N}$  HSQC spectrum (Fig. 4A). The backbone chemical shifts of MED25  
197 ACID were assigned *de novo* by measuring 3D triple resonance experiments on  $^{13}\text{C}^{15}\text{N}$ -  
198 labelled MED25 ACID. During the titration, perturbations of individual MED25 ACID amide  
199 signals were observed, showing that the NS1 $\alpha$ 3 peptide binds to MED25 ACID (Fig. 4A). For  
200 most of these residues, saturation was reached at a molar protein:peptide ratio  $r \sim 2$ . Due to  
201 the small size of the peptide, no significant line broadening was observed for the NMR signals  
202 of the complex as compared to free protein, which facilitated data analysis. Most perturbed  
203 signals exhibited a linear variation of chemical shifts up to saturation, indicative of a fast  
204 chemical exchange regime. Several residues, like Gly524, exhibited line broadening during  
205 titration, i.e. an intermediate exchange regime between free and bound forms (inset in Fig.  
206 4A). The broadened signals were recovered at  $r \sim 2$ . Chemical shifts perturbations (CSPs, Fig.  
207 4B) at  $r = 1.1$  were mapped onto the 3D structure of MED25 ACID (Fig. 4C). All these  
208 perturbations were predominantly located on the H2 face of MED25 ACID, corresponding to  
209 the binding surface of the second transactivation domain (TAD2) of VP16 (26, 27, 29).  
210 Mapping of residues in intermediate exchange onto the MED25 ACID structure revealed that  
211 they also belong to the H2 face (Fig. 4D), suggesting that they report on the same binding  
212 event as those in fast exchange. An exchange rate between free and bound states of  $\sim 500 \text{ s}^{-1}$   
213  $^1$  was estimated from the resonance frequency difference in the intermediate exchange.  
214 Intriguingly, the area perturbed by NS1 $\alpha$ 3 extends to the junction between the H1 and H2



215 faces, suggesting that NS1 $\alpha$ 3 binding may be accompanied by conformational rearrangement  
216 of MED25 ACID, for example by repositioning of the C-terminal  $\alpha$ 3 helix with respect to the  $\beta$ -  
217 barrel (Fig. 4C and 4D).

218 Dissociation constants ( $K_d$ ) were extracted from CSPs. CSPs for residues with linear  
219 trajectories like Leu452, Met470 and Met512 were well fitted with a single binding site model  
220 (Fig. 5A-B). An average value of  $17 \pm 8 \mu\text{M}$  was calculated from  $^1\text{H}$  and  $^{15}\text{N}$  CSPs larger than  
221 mean+SD (Fig. 4B). The measured affinity is lower than those reported for individual TADs  
222 binding to MED25 ACID in the 0.5-1.5  $\mu\text{M}$  range (26, 30, 31). However, the affinity of full-  
223 length NS1 may be higher than that of the NS1 $\alpha$ 3 peptide, since the  $\alpha$ 3 helix is preformed in  
224 NS1. We did not observe any significant  $\text{H}_{\text{Ni}}-\text{H}_{\text{Ni}+1}$  cross-peaks typical of  $\alpha$ -helices in 2D  
225 NOESY and ROESY spectra of free NS1 $\alpha$ 3 peptide. Only residues 123-125 and 133-138,  
226 which do not display any  $\alpha$ -helical conformation in NS1, showed weak cross-peaks, indicating  
227 that free NS1 $\alpha$ 3 peptide remains mainly unstructured.

228 On closer inspection, saturation was not achieved at  $r = 2.3$  for all residues, as exemplified by  
229 Leu448 in Figure 5A. Other residues, like Ile541, displayed nonlinear chemical shift  
230 perturbation trajectories with a change at  $r \sim 1.7$  (Fig. 5A). Apparent  $K_d$  values extracted from  
231 the binding curves were found in the 200  $\mu\text{M}$  to 1 mM range (Fig. 5B). These results point to  
232 a second binding site of lower affinity. Mapping of the residues with high and low affinity onto  
233 the structure of MED25 ACID showed that residues with high affinity cluster on the H2 face,  
234 whereas residues with lower affinity cluster on the H1 face (Fig. 5C). Interestingly, the H1 face  
235 is the binding site for the TAD1 domain of VP16 (26, 27). Residues that sense the two binding  
236 modes cluster are located in between (Fig. 5C).

237 Taken together, our results show that the  $\alpha$ 3 region of NS1 primarily targets the H2 face of  
238 MED25 ACID, although weak binding also takes place at the H1 face. Even if the NS1 $\alpha$ 3  
239 peptide is unstructured in its free form, unlike full-length NS1, it is expected to fold into an  $\alpha$ -  
240 helix upon binding, like other TAD domains.

241

## 242 **NS1 competes with ATF6 $\alpha$ for binding to MED25 ACID**

243 MED25 is a target of several transcriptional activators, from cellular and viral origin (26, 27,  
244 29, 31, 40, 41), which bind either to the H1 or H2 face of MED25 ACID through their TAD  
245 domains (30). While VP16TAD1 and the Ets family transcription factor ERM TAD were shown  
246 to bind to H1 (27, 41), VP16TAD2 and p53TAD2 bind to H2 (26, 29, 31). Previous studies  
247 have also shown that the endoplasmic reticulum stress-responsive transcription factor  $\alpha$   
248 (ATF6 $\alpha$ ), that functions as a master regulator of ER stress response, also targets MED25 (42,  
249 43), and that the TAD of ATF6 $\alpha$  (residues 40-66, Fig. 6A) binds to the H2 site (30). Since NMR  
250 results indicated that NS1  $\alpha$ 3 helix binds to H2, we wondered whether NS1 could compete  
251 with a TAD domain, by using ATF6 $\alpha$ . A GST-ATF6 $\alpha$  construct containing the TAD domain  
252 (GST-ATF6 $\alpha$ TAD, residues 1-150), bound to glutathione beads, was incubated with  
253 recombinant MED25 ACID (30  $\mu$ M) and with increasing concentrations of NS1 protein (4-32  
254  $\mu$ M). The bound fractions were then analysed by SDS-PAGE and Coomassie blue staining.  
255 GST alone was used as a negative control. A truncated form of GST-ATF6 $\alpha$ TAD was co-  
256 purified with the full form, as shown in Fig. 6B. MED25 ACID was pulled down by GST-  
257 ATF6 $\alpha$ TAD, but not by GST (Fig. 6C), as previously published (42, 43). Adding NS1 inhibited  
258 MED25 ACID binding to GST-ATF6 $\alpha$ TAD in a dose dependent manner (Fig. 6D, upper panel).  
259 SDS-PAGE analysis of the unbound fractions showed that increasing concentration of NS1  
260 resulted in increasing amounts of unbound MED25 ACID (Fig. 6D lower panel). In summary,  
261 these data suggest that NS1 is able to compete for MED25 ACID binding with an H2-binding  
262 TAD domain such as ATF6 $\alpha$ TAD.

263

## 264 **Discussion**

### 265 **NS1 interacts with MED25 in cells**

266 A previous proteomics study aiming to identify host partners of RSV NS1 identified several  
267 proteins involved in transcription regulation, among them Mediator complex proteins (20).  
268 Recent NS1 co-immunoprecipitation and mass spectrometry analysis also identified subunits

269 of the complex, among them MED25 (16). By using a Y2H screen, we identified MED25 as  
270 an interacting partner of NS1. Our NanoLuc interaction assay confirmed the NS1-MED25  
271 interaction in cells and identified the MED25 ACID and NS1 C-terminal  $\alpha 3$  helix as interaction  
272 domains (Fig. 2A and B). NS1  $\alpha 3$  was further confirmed by GST pull-down (Fig. 3) and by  
273 NMR (Fig. 4 and Fig. 5) to directly interact with MED25 ACID.

274

275 Interestingly, NS1  $\alpha 3$  helix was previously shown to contribute to the modulation of host  
276 response to RSV infection (16, 18). Mutation of residues Y125, and L132/L133 in the NS1  $\alpha 3$   
277 helix or truncation of the entire  $\alpha 3$  helix impacted the ability of NS1 to inhibit type I IFN.  
278 Moreover, recombinant RSV viruses carrying these mutations showed attenuated replication  
279 in IFN-competent cells and differential gene expression in the IFN pathways as compared to  
280 WT RSV (18). The same amino acids (Y125, L133) appeared to be critical for MED25 ACID  
281 interaction. Importantly these NS1  $\alpha 3$  helix point mutants can still properly localize to the  
282 nucleus (Fig. 2D), showing that the NS1-MED25 interaction is not required for NS1 nuclear  
283 transport. The structural integrity of these mutants has been verified previously (18). Strikingly,  
284 in the dimeric crystal structure of NS1, L133 and Y125 make intra-protomer and inter-protomer  
285 contacts, respectively, while L132 makes inter-and intra-protomer contacts, suggesting that  
286 they are buried in the structure and not available for interactions. If NS1 is monomeric, Y125  
287 becomes accessible, whereas L132 and L133 anchor the  $\alpha 3$  helix to the  $\alpha, \beta$ -core of NS1.  
288 Since L133 appears to be critical for targeting MED25, this raises the question whether the  $\alpha 3$   
289 helix may dissociate from the  $\alpha, \beta$ -core in solution.

290

291 Our NMR data indicate that the NS1 $\alpha 3$  peptide preferentially binds to the H2 face of MED25  
292 ACID, like several TADs of transcriptional regulators (26, 29-31). Our NMR titration experiment  
293 displayed similar features to those reported for TADs of transcription regulator VP16 and p53,  
294 i.e. similar concentrations to reach saturation and fast chemical exchange, suggesting similar  
295 binding modes and affinities. The 10-20  $\mu\text{M}$   $K_d$  obtained by NMR for NS1  $\alpha 3$  is indeed  
296 comparable to the 8 $\mu\text{M}$  value measured for the TAD2 domain of p53 by ITC (31). The 8-fold

297 molar excess of peptide needed to reach saturation in the NMR titration by VP16-H2 H2 (26)  
298 also suggests 1-10  $\mu\text{M}$  affinity. Surprisingly ATF6 $\alpha$  (residues 40-66) binding, measured by  
299 fluorescence anisotropy, was stronger with a  $K_d$  of 0.5  $\mu\text{M}$  (30). Comparing the sequences of  
300 the three H2-binding TADs with that of NS1  $\alpha 3$  did not reveal striking sequence similarity (Fig.  
301 6A). Even residues that are critical for binding to MED25 ACID or function related to MED25  
302 do not display any common pattern, apart from the requirement for hydrophobic residues (Fig.  
303 6A). This is rather intriguing, but might underline that binding occurs in a multi-step process,  
304 with specificities for each TAD, as already pointed out by Henderson et al (30).

305

### 306 **NS1 competes with cellular TADs for targeting MED25**

307 Transcription activator ATF6 $\alpha$  functions as a master regulator of ER stress response. In  
308 response to ER stress, ATF6 $\alpha$  translocates to the Golgi, where it is processed, followed by  
309 transport to the nucleus, where it activates the unfolded protein response (UPR) genes (44,  
310 45). ATF6 $\alpha$  was shown to recruit the Mediator complex by binding directly to the MED25  
311 subunit (43), via the H2 site on MED25 ACID (30). Our NMR analysis showed direct binding  
312 of NS1 to the MED25 ACID H2 site (Fig. 4), suggesting that NS1 might be able to compete  
313 with ATF6 $\alpha$  for binding to MED25. Our competition studies showed a decrease of MED25  
314 ACID bound to ATF6 $\alpha$  in the presence of NS1 (Fig. 6), favouring this hypothesis. Very recently  
315 it was shown that RSV infection activates the UPR, partly by activating ATF6 $\alpha$ , to enhance  
316 virus production (46). While our study suggests that RSV could de-activate ATF6 $\alpha$  by NS1  
317 competing for MED25 binding, it is possible that activating and de-activating ATF6 $\alpha$  needs to  
318 be carefully balanced during RSV infection. Even as viruses utilize the host UPR to enhance  
319 virus production and host cell survival, the invoked UPR in turn has the potential to sense viral  
320 infection and trigger anti-viral responses (47).

321

322 Very recently, NS1 was shown to associate with chromatin, and gene regulatory elements  
323 such as enhancers of genes differentially expressed during RSV infection were singled out,  
324 suggesting a new role for NS1 in regulating host gene transcription (16). Importantly, 43% of

325 NS1 peaks identified by Chip-seq analysis coincided with Mediator peaks (16). Our results  
326 show a direct interaction between NS1 and MED25 via the H2 face of MED25 ACID, which  
327 rationalized NS1 association with Mediator peaks (16). Moreover, the Chip-seq analysis  
328 showed that the NS1  $\alpha 3$  helix mutant Y125A did not impact NS1 binding to chromatin, but  
329 modulated gene expression, which suggested that  $\alpha 3$  helix may be important for interaction  
330 with a cellular partner regulating host transcription (16).

331

332 MED25 has recently emerged as one of the most significant targets for functional interactions  
333 with a range of transcriptional activators, including Herpes simplex virus transactivation protein  
334 VP16 (27, 29), ATF6 $\alpha$  (43), ERM transcription factor (41), and p53 (31). Cellular and viral  
335 transcriptional activators that target MED25 are multi-domain proteins, which contain at least  
336 one transactivation domain (TAD) that binds the transactivator Mediator subunit MED25 and  
337 a DNA-binding domain that recognizes specific promoters/signals on target genes, which are  
338 then transcribed by RNA Pol II. Our results suggest that NS1 possesses a TAD domain and  
339 that this TAD is able to displace those of other regulation factors from the Mediator complex,  
340 thereby reducing related activation. Moreover, RSV NS1 and NS2 are the most abundantly  
341 transcribed RSV genes (15). On this basis we propose that NS1 could act as a transcription  
342 suppressor. This would present a new mechanism to control the host response upon RSV  
343 infection by interfering with activation of innate immune response genes by cellular  
344 transcriptional activators. Given the central role of NS1 in antagonizing the innate immune  
345 response to RSV, and MED25 being targetable by allosteric small molecules (30), our data  
346 could open a new avenue for RSV drug design.

347

## 348 **MATERIALS AND METHODS**

### 349 **Plasmid constructs**

350 Custom synthesized pciNanoLuc 114 and 11S vectors (GeneCust) were used to clone the  
351 codon-optimized hRSV NS1 and MED25 constructs using standard PCR, digestion and  
352 ligation techniques. pcineo NS1 single site mutants in the full-length construct were generated

353 by using the Q5 site-directed mutagenesis kit (New England BioLabs), following the  
354 manufacturer recommendations. pGEX4T3 was used to clone NS1 using standard PCR,  
355 digestion and ligation techniques. pGEX NS1  $\alpha$ 3, and pGEX NS1 single site mutants were re-  
356 cloned from pcineo vector using standard PCR, digestion and ligation techniques. MED25  
357 (Addgene) deletion mutants were obtained by introducing start and stop codons at the  
358 appropriate site in the coding sequence (MED25 VWD aa 1-231 and MED25 ACID aa 389-  
359 543). pet41s GST ATF6 $\alpha$ TAD (aa 1-150) (Addgene) contained the TAD domain.

360

### 361 **Y2H screen**

362 The Y2H screen was performed as previously described (48). The DNA sequence encoding  
363 RSV NS1 was cloned by *in vitro* recombination (Gateway technology; Invitrogen) from  
364 pDONR207 into the Y2H vector pPC97-GW to be expressed as a fusion protein with the GAL4  
365 DNA-binding domain (GAL4-BD). AH109 yeast cells (Clontech; Takara, Mountain View, CA,  
366 USA) were transformed with this construct using a standard lithium-acetate protocol. Screens  
367 were performed on a synthetic medium lacking histidine (-His) and supplemented with 3-  
368 amino-1,2,4-triazole (3-AT). A mating strategy was used to screen a commercial human  
369 spleen cDNA library (Invitrogen) established in the pPC86 vector to express cellular proteins  
370 in fusion downstream of the GAL4 transactivation domain (GAL4-AD). After 6 days of culture,  
371 colonies were picked and replica plated over three weeks to maintain selection and eliminate  
372 potential contaminants. cDNA inserts were amplified from positive yeast colonies using  
373 primers that hybridize within the backbone of the pPC86 vector. After sequencing of the PCR  
374 products, cellular interactors were identified by multi-parallel BLAST analysis.

375

### 376 **Bacteria expression and purification of recombinant proteins**

377 MED25 ACID (residues Leu389-Asn543) was produced with an N-terminal 6xHis-tag followed  
378 by a T7 tag from a pET28-derived plasmid. *E. coli* BL21(DE3) bacteria transformed with the  
379 pET28 MED25 ACID plasmid were grown from fresh starter culture in Luria-Bertani (LB) broth

380 at 37°C to an optical density of 0.6 at 600 nm, followed by induction with 0.2 mM isopropyl- $\beta$ -  
381 D-thiogalactoside (IPTG) for 18 h at 20°C. Cells were lysed by sonication (4 times for 20 s  
382 each time) and lysozyme (1 mg/ml; Sigma-Aldrich) in 50 mM Na phosphate, 300 mM NaCl,  
383 10 mM imidazole pH 8, plus protease inhibitors (Roche). Lysates were clarified by  
384 centrifugation (23,425 g, 30 min, 4°C), and the soluble MED25 ACID protein was purified on  
385 1 ml beads loaded with Ni-NTA (GE Healthcare). The bound protein was washed extensively  
386 with loading buffer containing 25 mM imidazole and eluted with a 250 mM imidazole pH 8.  
387  $^{15}\text{N}$ - and  $^{15}\text{N}^{13}\text{C}$ -labelled MED25 ACID samples were produced in minimal M9 medium  
388 supplemented with 2 mM  $\text{MgSO}_4$ , 100  $\mu\text{M}$   $\text{CaCl}_2$ , 1X MEM vitamin solution (Gibco), 30  $\mu\text{g}\cdot\text{mL}^{-1}$   
389  $^1$  kanamycin, 1  $\text{g}\cdot\text{L}^{-1}$   $^{15}\text{NH}_4\text{Cl}$  (Eurisotop, France) and 4  $\text{g}\cdot\text{L}^{-1}$  glucose or 3  $\text{g}\cdot\text{L}^{-1}$   $^{13}\text{C}$ -glucose  
390 (Eurisotop, France). Expression was induced with 0.1 mM IPTG. Lysis, clarification and  
391 purification, using 2 mL Ni-NTA resin (ThermoFisher, France) per liter of culture, were carried  
392 out as described for unlabelled MED25 ACID. The eluted His-tagged protein was then dialyzed  
393 into 20 mM Na phosphate pH 6.5, 100 mM NaCl buffer supplemented with 0.5 mM  
394 dithiothreitol (DTT) using a 10 kDa cut-off membrane (Spectrapor). The protein samples were  
395 further purified by gel filtration on a Superdex S75 HR 10/30 column (GE Healthcare). Samples  
396 were then concentrated to ~500  $\mu\text{M}$  using 10 kDa cut-off centrifugal filter units (Amicon Ultra,  
397 Millipore) and the DTT concentration raised to 5 mM. The concentration was determined by  
398 measuring the absorption at 280 nm and applying a molar extinction coefficient of 22,460  $\text{mol}^{-1}\cdot\text{cm}^{-1}$ .  
399

400 For NS1 expression, *E. coli* BL21(DE3) bacteria transformed with the pGEX-NS1 plasmid  
401 were grown from fresh starter culture in LB broth at 37°C to an optical density of 0.8 at 600  
402 nm, followed by induction with 0.5 mM IPTG for 18 h at 20°C. Cells were lysed by sonication  
403 (4 times for 20 s each time) and lysozyme (1 mg/ml; Sigma) in 20 mM Tris-HCl, 300 mM NaCl,  
404 5% glycerol, pH 8, plus protease inhibitors (Roche). Lysates were clarified by centrifugation  
405 (23,425 g, 30 min, 4°C), and the soluble GST-NS1 was purified on 1 ml Glutathione Sepharose  
406 beads (cytiva). The bound protein was washed with 20 mM Tris-HCl, 1M NaCl, 5% glycerol,

407 pH 8, followed by wash with 20 mM Tris-HCl, 300 mM NaCl, 5% glycerol, 5 mM 2-  
408 mercaptoethanol, pH 8. GST-NS1 beads were then washed with 20 mM Tris-HCl, 150 mM  
409 NaCl, 2.5 mM CaCl<sub>2</sub>, 5 mM 2-mercaptoethanol, pH 8 and incubated with Biotinylated-thrombin  
410 protease (Novagen) over night at 4°C. The supernatant NS1 fraction was collected and  
411 incubated with Streptavidin agarose (Millipore) for 1 h at 4°C in order to eliminate Thrombin.  
412 Purified NS1 was then concentrated using Vivaspins columns (Sartorius).  
413 For GST and GST-ATF6 $\alpha$ TAD expression, *E. coli* BL21(DE3) bacteria transformed with the  
414 pGEX or pet41s-ATF6 $\alpha$  plasmid were grown from fresh starter culture in LB broth at 37°C to  
415 an optical density of 0.5 at 600 nm, followed by induction with 1 mM IPTG for 18 h at 20°C.  
416 Cells were lysed by sonication (4 times for 20 s each time) and lysozyme (1 mg/ml; Sigma) in  
417 50 mM Tris-HCl, 300 mM NaCl, pH 8, plus protease inhibitors (Roche). Lysates were clarified  
418 by centrifugation (23,425 g, 30 min, 4°C), and the soluble GST-ATF6 $\alpha$ TAD protein was  
419 purified on 1 ml Glutathione Sepharose beads (Cytiva). The bound protein was washed  
420 extensively with 50 mM Tris-HCl and 150 mM NaCl, pH 8.

421

#### 422 **Peptide preparation**

423 N-acetylated NS1  $\alpha$ 3 peptide Ac-SDSTMTNYMNQLSELLGFDLNP (RSV NS1 residues  
424 Ser118-Pro139) was synthesized by GeneCust (Luxemburg) with >95% purity, as assessed  
425 by HPLC. Aliquots of 2 mg were suspended in 1 mL MQ water and dispersed by sonication.  
426 The pH was neutralized by addition of 1 M NaOH, leading to complete dissolution. The  
427 concentration was determined by measuring the absorption at 280 nm and applying a molar  
428 extinction coefficient of 1490 mol<sup>-1</sup>·cm<sup>-1</sup>. The quality of the peptide solution was assessed by  
429 NMR. Aliquots were lyophilized for the titration experiment with <sup>15</sup>N-MED25 ACID.

430

#### 431 **Pull-down experiments**

432 To validate NS1-MED25 ACID interaction, MED25 ACID was co-expressed together with  
433 GST, GST-NS1 or GST-NS1  $\alpha$ 3 helix. *E. coli* BL21(DE3) bacteria were transformed with the



434 pet28 MED25 ACID plasmid together with empty pGEX, pGEX NS1, or pGEX NS1  $\alpha$ 3 helix.  
435 Protein induction was as for MED25 ACID alone (see above). Cells were lysed by sonication  
436 (4 times for 20 s each time) and lysozyme (1 mg/ml; Sigma) in 50 mM Na Phosphate, 300 mM  
437 NaCl, pH 8, plus protease inhibitors (Roche). Lysates were clarified by centrifugation (23,425  
438 g, 30 min, 4°C), and the soluble proteins complexes were purified on 1 ml Glutathione  
439 Sepharose beads (cytiva). Beads were washed with 50 mM Tris-HCl and 150 mM NaCl, pH  
440 8, and the bound proteins were analysed by SDS-PAGE and Commassie staining.

441

#### 442 **Cell culture**

443 293T cells were maintained in Dulbecco modified Eagle medium (eurobio) supplemented with  
444 10% fetal calf serum (FCS; eurobio), 1% L-glutamine, and 1 % penicillin streptomycin. The  
445 transformed human bronchial epithelial cell line (BEAS-2B) (ATCC CRL-9609) was  
446 maintained in RPMI 1640 medium (eurobio) supplemented with 10% fetal calf serum (FCS;  
447 eurobio), 1% L-glutamine, and 1% penicillin-streptomycin. The cells were grown at 37°C in 5%  
448 CO<sub>2</sub>.

449

#### 450 **NS1-ATF6 $\alpha$ TAD competition assay**

451 GST and GST-ATF6 $\alpha$ TAD were expressed in BL21 *E.coli* and purified on Glutathione beads  
452 as described above. 50  $\mu$ l GST or GST-ATF6 $\alpha$ TAD beads were incubated with 30  $\mu$ M purified  
453 MED25 ACID without or with increasing concentration of NS1 protein (4-32 $\mu$ M) for 2 h at 4°C.  
454 After incubation, the supernatants were collected for analysis. Beads were washed with 50  
455 mM Tris-HCl and 150 mM NaCl, pH 8, and the samples corresponding to proteins bound to  
456 beads or recovered in the supernatant were analysed by SDS-PAGE and Commassie  
457 staining.

458

#### 459 **NanoLuc interaction assay**

460 Constructs expressing the NanoLuc subunits 114S and 11S were used (32). 293T cells were  
461 seeded at a concentration of  $3 \times 10^4$  cells per well in 48-well plate. After 24 h, cells were co-  
462 transfected in triplicate with 0.4  $\mu\text{g}$  of total DNA (0.2  $\mu\text{g}$  of each plasmid) using Lipofectamine  
463 2000 (Invitrogen). 24 h post transfection cells were washed with PBS, and lysed for 1 h in  
464 room temperature using 50  $\mu\text{l}$  NanoLuc lysis buffer (Promega). NanoLuc enzymatic activity  
465 was measured using the NanoLuc substrate (Promega). For each pair of plasmids, three  
466 normalized luminescence ratios (NLRs) were calculated as follows: the luminescence activity  
467 measured in cells transfected with the two plasmids (each viral protein fused to a different  
468 NanoLuc subunit) was divided by the sum of the luminescence activities measured in both  
469 control samples (each NanoLuc fused viral protein transfected with an plasmid expressing  
470 only the NanoLuc subunit). Data represent the mean  $\pm$ SD of 4 independent experiments, each  
471 done in triplicate. Luminescence was measured using Infinite 200 Pro (Tecan, Männedorf,  
472 Switzerland).

473

#### 474 **Immunostaining and imaging**

475 Overnight cultures of BEAS-2B cells seeded at  $4 \times 10^5$  cells/well in 6-well plates (on a 16-mm  
476 micro-cover glass for immunostaining) were transfected with pcineo plasmids (0.4  $\mu\text{g}$ ) carrying  
477 the RSV codon-optimised NS1 or FLAG-NS1 WT or mutant constructs using Lipofectamine  
478 2000 (Invitrogen) according to the manufacturer's recommendations. At 24 h post transfection  
479 cells were fixed with 4% paraformaldehyde in PBS for 10 min, blocked with 3% BSA in 0.2%  
480 Triton X-100–PBS for 10 min, and immunostained with monoclonal anti-FLAG (1:2000; Sigma)  
481 antibodies, followed by species-specific secondary antibody conjugated to Alexa Fluor 488 (1:  
482 1,000; Invitrogen). Images were obtained using Nikon TE200 inverted microscope equipped  
483 with a Photometrics CoolSNAP ES2 camera. Images were processed using MetaVue software  
484 (Molecular Devices).

485

## 486 Nuclear Magnetic Resonance (NMR) measurements

487 NMR measurements were performed on a Bruker Avance III NMR spectrometer operating at  
488 a magnetic field of 18.8 T (800 MHz  $^1\text{H}$  frequency) and equipped with a cryogenic TCI probe.  
489 All samples were prepared in 20 mM Na phosphate pH 6.5, 100 mM NaCl, 5 mM DTT buffer  
490 and contained 7.5 %  $^2\text{H}_2\text{O}$  to lock the spectrometer frequency. The temperature was set to  
491 293 K. BEST-TROSY versions of triple resonance 3D experiments (49) were acquired on  
492  $^{13}\text{C}^{15}\text{N}$ -labeled MED25 ACID (460  $\mu\text{M}$  final concentration) for backbone assignment, with a  
493 0.2 ms recycling delay: HNCO, HNCA, HN(CO)CA, CB-optimized HNCACB and  
494 HN(CO)CACB. A standard 3D  $^{15}\text{N}$  NOESY-HSQC experiment was recorded at 700 MHz on  
495 300  $\mu\text{M}$   $^{15}\text{N}$ -labeled MED25 ACID to confirm chemical shift assignments.  $^1\text{H}$  chemical shifts  
496 were referenced to DSS. NMR data were processed within TopSpin 4.0 (Bruker Biospin,  
497 Wissembourg) and analysed with CcpNmr Analysis 2.4 software (50). The titration experiment  
498 of  $^{15}\text{N}$ -MED25 ACID (245  $\mu\text{M}$ ) by NS1 $\alpha$ 3 peptide was carried out by recording 2D  $^1\text{H}$ - $^{15}\text{N}$   
499 HSQC spectra, using a BEST-TROSY sequence. At each titration point, a lyophilized peptide  
500 aliquot was added to keep the protein concentration constant at 225  $\mu\text{M}$ , starting at 0.1 and  
501 ending at 2.3 molar equivalents. Combined amide  $^1\text{H}$  and  $^{15}\text{N}$  chemical shift perturbations  
502  $\Delta\delta_{\text{HN}}$  were calculated with a scaling factor of 1/10 for  $^{15}\text{N}$ , corresponding to the ratio of  
503 gyromagnetic ratios between  $^{15}\text{N}$  and  $^1\text{H}$  (Eq 1):

$$504 \quad \Delta\delta_{\text{HN}} = \sqrt{\left((\delta^1\text{H} - \delta^1\text{H}_{ref})^2 + (\delta^{15}\text{N} - \delta^{15}\text{N}_{ref})^2 / 100\right)} \quad \text{Eq 1}$$

505 Dissociation constant  $K_d$  values were extracted by fitting MED25 ACID  $^1\text{H}$  and/or  $^{15}\text{N}$  chemical  
506 shift perturbations as a function of the ligand ratio, i.e. the peptide:protein molar ratio ( $r$ ), with  
507 a single site binding model and assuming a fast chemical exchange regime (Eq 2), using  
508 CcpNmr Analysis software.

$$509 \quad (\delta - \delta_{ref}) = \frac{1}{2}(\delta_{sat} - \delta_{ref}) \times \left( \frac{K_d}{[\text{MED25}]_{tot}} + 1 + r - \sqrt{\left(\frac{K_d}{[\text{MED25}]_{tot}} + 1 + r\right)^2 - 4r} \right) \quad \text{Eq 2}$$

510 The exchange rate between free and bound states,  $k_{ex}$ , was estimated from the resonance  
511 frequency difference  $\Delta\nu$  in the intermediate exchange according to  $k_{ex} = \pi * \Delta\nu$ .

512

### 513 **Illustrations**

514 Structural representations were prepared with Pymol (Schrodinger, LLC, The PyMOL  
515 Molecular Graphics System 1.3). Graphic rendering of sequence alignment was made with  
516 Esript3.0 (51).

517

### 518 **Acknowledgements**

519 This work was supported by Region Ile de France (DIM 1-HEALTH 2021) and Université Paris  
520 Saclay (J.D., doctoral fellowship).

521

522 **Conflicts of Interest:** “The authors declare no conflict of interest.”

523

### 524 **REFERENCES**

- 525 1. Group TPERfCHPS. 2019. Causes of severe pneumonia requiring hospital admission in children  
526 without HIV infection from Africa and Asia:  
527 the PERCH multi-country case-control study. *Lancet* 394:757-79.
- 528 2. Nair H, Nokes DJ, Gessner BD, Dherani M, Madhi SA, Singleton RJ, O'Brien KL, Roca A, Wright  
529 PF, Bruce N, Chandran A, Theodoratou E, Sutanto A, Sedyaningsih ER, Ngama M, Munywoki  
530 PK, Kartasmita C, Simoes EA, Rudan I, Weber MW, Campbell H. 2010. Global burden of acute  
531 lower respiratory infections due to respiratory syncytial virus in young children: a systematic  
532 review and meta-analysis. *Lancet* 375:1545-55.
- 533 3. Coultas JA, Smyth R, Openshaw PJ. 2019. Respiratory syncytial virus (RSV): a scourge from  
534 infancy to old age. *Thorax* 74:986-993.
- 535 4. Easton AJ, Domachowske JB, Rosenberg HF. 2004. Animal pneumoviruses: molecular genetics  
536 and pathogenesis. *Clin Microbiol Rev* 17:390-412.
- 537 5. Valarcher JF, Taylor G. 2007. Bovine respiratory syncytial virus infection. *Vet Res* 38:153-80.
- 538 6. Openshaw PJM, Chiu C, Culley FJ, Johansson C. 2017. Protective and Harmful Immunity to RSV  
539 Infection. *Annu Rev Immunol* 35:501-532.
- 540 7. Russell CD, Unger SA, Walton M, Schwarze J. 2017. The Human Immune Response to  
541 Respiratory Syncytial Virus Infection. *Clin Microbiol Rev* 30:481-502.
- 542 8. Hijano DR, Vu LD, Kauvar LM, Tripp RA, Polack FP, Cormier SA. 2019. Role of Type I Interferon  
543 (IFN) in the Respiratory Syncytial Virus (RSV) Immune Response and Disease Severity. *Front*  
544 *Immunol* 10:566.
- 545 9. Bossert B, Conzelmann KK. 2002. Respiratory syncytial virus (RSV) nonstructural (NS) proteins  
546 as host range determinants: a chimeric bovine RSV with NS genes from human RSV is  
547 attenuated in interferon-competent bovine cells. *J Virol* 76:4287-93.

- 548 10. Collins PL, Karron, R.A. 2013. Respiratory syncytial virus and metapneumovirus. *In* Wolters K  
549 (ed), Chapter in *Fields of Virology*, Sixth edition, vol 1.
- 550 11. Thornhill EM, Verhoeven D. 2020. Respiratory Syncytial Virus's Non-structural Proteins:  
551 Masters of Interference. *Front Cell Infect Microbiol* 10:225.
- 552 12. Sedeyn K, Schepens B, Saelens X. 2019. Respiratory syncytial virus nonstructural proteins 1  
553 and 2: Exceptional disrupters of innate immune responses. *PLoS Pathog* 15:e1007984.
- 554 13. Boyapalle S, Wong T, Garay J, Teng M, San Juan-Vergara H, Mohapatra S. 2012. Respiratory  
555 syncytial virus NS1 protein colocalizes with mitochondrial antiviral signaling protein MAVS  
556 following infection. *PLoS One* 7:e29386.
- 557 14. Ban J, Lee NR, Lee NJ, Lee JK, Quan FS, Inn KS. 2018. Human Respiratory Syncytial Virus NS 1  
558 Targets TRIM25 to Suppress RIG-I Ubiquitination and Subsequent RIG-I-Mediated Antiviral  
559 Signaling. *Viruses* 10.
- 560 15. Swedan S, Andrews J, Majumdar T, Musiyenko A, Barik S. 2011. Multiple functional domains  
561 and complexes of the two nonstructural proteins of human respiratory syncytial virus  
562 contribute to interferon suppression and cellular location. *J Virol* doi:10.1128/JVI.00413-11.
- 563 16. Pei J, Beri NR, Zou AJ, Hubel P, Dorando HK, Bergant V, Andrews RD, Pan J, Andrews JM,  
564 Sheehan KCF, Pichlmair A, Amarasinghe GK, Brody SL, Payton JE, Leung DW. 2021. Nuclear-  
565 localized human respiratory syncytial virus NS1 protein modulates host gene transcription.  
566 *Cell Rep* 37:109803.
- 567 17. Money VA, McPhee HK, Mosely JA, Sanderson JM, Yeo RP. 2009. Surface features of a  
568 Mononegavirales matrix protein indicate sites of membrane interaction. *Proc Natl Acad Sci U*  
569 *S A* 106:4441-6.
- 570 18. Chatterjee S, Luthra P, Esaulova E, Agapov E, Yen BC, Borek DM, Edwards MR, Mittal A, Jordan  
571 DS, Ramanan P, Moore ML, Pappu RV, Holtzman MJ, Artyomov MN, Basler CF, Amarasinghe  
572 GK, Leung DW. 2017. Structural basis for human respiratory syncytial virus NS1-mediated  
573 modulation of host responses. *Nat Microbiol* 2:17101.
- 574 19. Forster A, Maertens GN, Farrell PJ, Bajorek M. 2015. Dimerization of matrix protein is required  
575 for budding of respiratory syncytial virus. *J Virol* 89:4624-35.
- 576 20. Wu W, Tran KC, Teng MN, Heesom KJ, Matthews DA, Barr JN, Hiscox JA. 2012. The interactome  
577 of the human respiratory syncytial virus NS1 protein highlights multiple effects on host cell  
578 biology. *J Virol* 86:7777-89.
- 579 21. Flanagan PM, Kelleher RJ, 3rd, Sayre MH, Tschochner H, Kornberg RD. 1991. A mediator  
580 required for activation of RNA polymerase II transcription in vitro. *Nature* 350:436-8.
- 581 22. Kim YJ, Bjorklund S, Li Y, Sayre MH, Kornberg RD. 1994. A multiprotein mediator of  
582 transcriptional activation and its interaction with the C-terminal repeat domain of RNA  
583 polymerase II. *Cell* 77:599-608.
- 584 23. Soutourina J. 2018. Transcription regulation by the Mediator complex. *Nat Rev Mol Cell Biol*  
585 19:262-274.
- 586 24. Mittler G, Stuhler T, Santolin L, Uhlmann T, Kremmer E, Lottspeich F, Berti L, Meisterernst M.  
587 2003. A novel docking site on Mediator is critical for activation by VP16 in mammalian cells.  
588 *EMBO J* 22:6494-504.
- 589 25. Yang F, DeBeaumont R, Zhou S, Naar AM. 2004. The activator-recruited cofactor/Mediator  
590 coactivator subunit ARC92 is a functionally important target of the VP16 transcriptional  
591 activator. *Proc Natl Acad Sci U S A* 101:2339-44.
- 592 26. Vojnic E, Mourao A, Seizl M, Simon B, Wenzek L, Lariviere L, Baumli S, Baumgart K,  
593 Meisterernst M, Sattler M, Cramer P. 2011. Structure and VP16 binding of the Mediator  
594 Med25 activator interaction domain. *Nat Struct Mol Biol* 18:404-9.
- 595 27. Milbradt AG, Kulkarni M, Yi T, Takeuchi K, Sun ZY, Luna RE, Selenko P, Naar AM, Wagner G.  
596 2011. Structure of the VP16 transactivator target in the Mediator. *Nat Struct Mol Biol* 18:410-  
597 5.

- 598 28. Zhao H, Young N, Kalchschmidt J, Lieberman J, El Khattabi L, Casellas R, Asturias FJ. 2021.  
599 Structure of mammalian Mediator complex reveals Tail module architecture and interaction  
600 with a conserved core. *Nat Commun* 12:1355.
- 601 29. Bontems F, Verger A, Dewitte F, Lens Z, Baert JL, Ferreira E, de Launoit Y, Sizun C, Guittet E,  
602 Villeret V, Monte D. 2011. NMR structure of the human Mediator MED25 ACID domain. *J*  
603 *Struct Biol* 174:245-51.
- 604 30. Henderson AR, Henley MJ, Foster NJ, Peiffer AL, Beyersdorf MS, Stanford KD, Sturlis SM,  
605 Linhares BM, Hill ZB, Wells JA, Cierpicki T, Brooks CL, 3rd, Fierke CA, Mapp AK. 2018.  
606 Conservation of coactivator engagement mechanism enables small-molecule allosteric  
607 modulators. *Proc Natl Acad Sci U S A* 115:8960-8965.
- 608 31. Lee MS, Lim K, Lee MK, Chi SW. 2018. Structural Basis for the Interaction between p53  
609 Transactivation Domain and the Mediator Subunit MED25. *Molecules* 23.
- 610 32. Dixon AS, Schwinn MK, Hall MP, Zimmerman K, Otto P, Lubben TH, Butler BL, Binkowski BF,  
611 Machleidt T, Kirkland TA, Wood MG, Eggers CT, Encell LP, Wood KV. 2016. NanoLuc  
612 Complementation Reporter Optimized for Accurate Measurement of Protein Interactions in  
613 Cells. *ACS Chem Biol* 11:400-8.
- 614 33. Castagne N, Barbier A, Bernard J, Rezaei H, Huet JC, Henry C, Da Costa B, Eleouet JF. 2004.  
615 Biochemical characterization of the respiratory syncytial virus P-P and P-N protein complexes  
616 and localization of the P protein oligomerization domain. *J Gen Virol* 85:1643-53.
- 617 34. Llorente MT, Taylor IA, Lopez-Vinas E, Gomez-Puertas P, Calder LJ, Garcia-Barreno B, Melero  
618 JA. 2008. Structural properties of the human respiratory syncytial virus P protein: evidence for  
619 an elongated homotetrameric molecule that is the smallest orthologue within the family of  
620 paramyxovirus polymerase cofactors. *Proteins* 72:946-58.
- 621 35. Gilman MSA, Liu C, Fung A, Behera I, Jordan P, Rigaux P, Ysebaert N, Tcherniuk S, Sourimant J,  
622 Eleouet JF, Sutto-Ortiz P, Decroly E, Roymans D, Jin Z, McLellan JS. 2019. Structure of the  
623 Respiratory Syncytial Virus Polymerase Complex. *Cell* 179:193-204 e14.
- 624 36. Simabuco FM, Asara JM, Guerrero MC, Libermann TA, Zerbini LF, Ventura AM. 2011. Structural  
625 analysis of human respiratory syncytial virus p protein: identification of intrinsically disordered  
626 domains. *Braz J Microbiol* 42:340-5.
- 627 37. Noval MG, Esperante SA, Molina IG, Chemes LB, Prat-Gay G. 2016. Intrinsic Disorder to Order  
628 Transitions in the Scaffold Phosphoprotein P from the Respiratory Syncytial Virus RNA  
629 Polymerase Complex. *Biochemistry* 55:1441-54.
- 630 38. Pereira N, Cardone C, Lassoued S, Galloux M, Fix J, Assrir N, Lescop E, Bontems F, Eleouet JF,  
631 Sizun C. 2017. New Insights into Structural Disorder in Human Respiratory Syncytial Virus  
632 Phosphoprotein and Implications for Binding of Protein Partners. *J Biol Chem* 292:2120-2131.
- 633 39. Pretel E, Sanchez IE, Fassolari M, Chemes LB, de Prat-Gay G. 2015. Conformational  
634 Heterogeneity Determined by Folding and Oligomer Assembly Routes of the Interferon  
635 Response Inhibitor NS1 Protein, Unique to Human Respiratory Syncytial Virus. *Biochemistry*  
636 54:5136-46.
- 637 40. Yang M, Hay J, Ruyechan WT. 2008. Varicella-zoster virus IE62 protein utilizes the human  
638 mediator complex in promoter activation. *J Virol* 82:12154-63.
- 639 41. Landrieu I, Verger A, Baert JL, Rucktooa P, Cantrelle FX, Dewitte F, Ferreira E, Lens Z, Villeret  
640 V, Monte D. 2015. Characterization of ERM transactivation domain binding to the ACID/PTOV  
641 domain of the Mediator subunit MED25. *Nucleic Acids Res* 43:7110-21.
- 642 42. Sela D, Chen L, Martin-Brown S, Washburn MP, Florens L, Conaway JW, Conaway RC. 2012.  
643 Endoplasmic reticulum stress-responsive transcription factor ATF6alpha directs recruitment  
644 of the Mediator of RNA polymerase II transcription and multiple histone acetyltransferase  
645 complexes. *J Biol Chem* 287:23035-45.
- 646 43. Sela D, Conkright JJ, Chen L, Gilmore J, Washburn MP, Florens L, Conaway RC, Conaway JW.  
647 2013. Role for human mediator subunit MED25 in recruitment of mediator to promoters by

- 648 endoplasmic reticulum stress-responsive transcription factor ATF6alpha. J Biol Chem  
649 288:26179-26187.
- 650 44. Haze K, Yoshida H, Yanagi H, Yura T, Mori K. 1999. Mammalian transcription factor ATF6 is  
651 synthesized as a transmembrane protein and activated by proteolysis in response to  
652 endoplasmic reticulum stress. Mol Biol Cell 10:3787-99.
- 653 45. Chen X, Shen J, Prywes R. 2002. The luminal domain of ATF6 senses endoplasmic reticulum  
654 (ER) stress and causes translocation of ATF6 from the ER to the Golgi. J Biol Chem 277:13045-  
655 52.
- 656 46. Qiao D, Skibba M, Xu X, Garofalo RP, Zhao Y, Brasier AR. 2021. Paramyxovirus replication  
657 induces the Hexosamine Biosynthetic Pathway and Mesenchymal Transition via the IRE1a-  
658 XBP1s arm of the Unfolded Protein Response. Am J Physiol Lung Cell Mol Physiol  
659 doi:10.1152/ajplung.00127.2021.
- 660 47. Smith JA. 2014. A new paradigm: innate immune sensing of viruses via the unfolded protein  
661 response. Front Microbiol 5:222.
- 662 48. Vidalain PO, Jacob Y, Hagemeyer MC, Jones LM, Neveu G, Roussarie JP, Rottier PJ, Tangy F, de  
663 Haan CA. 2015. A field-proven yeast two-hybrid protocol used to identify coronavirus-host  
664 protein-protein interactions. Methods Mol Biol 1282:213-29.
- 665 49. Solyom Z, Schwarten M, Geist L, Konrat R, Willbold D, Brutscher B. 2013. BEST-TROSY  
666 experiments for time-efficient sequential resonance assignment of large disordered proteins.  
667 J Biomol NMR 55:311-21.
- 668 50. Vranken WF, Boucher W, Stevens TJ, Fogh RH, Pajon A, Llinas M, Ulrich EL, Markley JL, Ionides  
669 J, Laue ED. 2005. The CCPN data model for NMR spectroscopy: development of a software  
670 pipeline. Proteins 59:687-96.
- 671 51. Gouet P, Robert X, Courcelle E. 2003. ESPript/ENDscript: Extracting and rendering sequence  
672 and 3D information from atomic structures of proteins. Nucleic Acids Res 31:3320-3.

673

## 674 **FIGURE LEGENDS**

675 **Figure 1: Representation of hRSV NS1 and MED25 structural organisation. (A)** Structural  
676 organization of hRSV NS1 protein, which displays an  $\alpha$ , $\beta$ -core domain and a C-terminal  $\alpha$ 3  
677 helix. Sequence alignment of *Orthopneumovirus* NS1 proteins: hRSV NS1 construct used in  
678 the present study, human RSV A (Uniprot P0DOE9), B (O42083) and Long (Q86306) strains,  
679 bovine RSV (Q65694) and ovine RSV (Q65703). Alignment was generated on the ClustalW  
680 server. The secondary structure elements observed in the crystallographic structure of hRSV  
681 NS1 (18) are indicated above the sequence. **(B)** Domain architecture of the Mediator subunit  
682 MED25 that contains two folded domains: the N-terminal von Willebrand domain (VWD) and  
683 the central activator interaction domain (ACID) (26, 27). The boundaries of the constructs used  
684 in this study are indicated.

685

686 **Figure 2: NS1 interacts with MED25 in cells.** MED25 and NS1 interactions were measured  
687 using the NanoLuc assay **(A)** using MED25 domain deletions or **(B)** using MED25 ACID and  
688 FLAG NS1 WT and  $\alpha 3$  helix mutants. 293T cells were transfected with pairs of constructs,  
689 combined as shown in the graph. P/P and NS1/NS1 were used as positive controls. The NLR  
690 is the ratio between actual read and negative controls (each protein with the empty NanoLUC  
691 vector). The graph is representative of four independent experiments, each done in three  
692 technical repeats. Data represents the means and error bars represent standard deviation  
693 across 4 independent biological replicates. \* $p < 0.05$ , \*\* $p < 0.01$ , \*\*\* $p < 0.001$  (unpaired two-tailed  
694 t-test). **(C)** 293T cells were transfected with plasmids encoding NS1, FLAG NS1 or FLAG NS1  
695 mutants fused to 114 NanoLUC subunit, and cell lysates were then subjected to Western  
696 analysis using anti-FLAG antibody. Size markers are shown on the left side of the gel. **(D)**  
697 BEAS-2B cells were transfected with plasmids encoding NS1, FLAG NS1 or FLAG NS1  
698 mutants fused to 114 NanoLUC subunit. Cells were fixed, and immunostained with anti-FLAG  
699 (green) antibody followed by Alexa Fluor secondary antibody, and were analysed by  
700 microscopy. Scale bars represent 10 $\mu$ m.

701 **Figure 3: Validation of NS1-MED25 ACID interaction by GST pull-down assay. (A)**  
702 MED25 ACID was co-expressed together with GST, GST-NS1, GST-NS1  $\alpha 3$  helix in *E. coli*  
703 BL21(DE3) bacteria. Bacteria lysates were clarified and the soluble proteins complexes were  
704 purified on glutathione-Sepharose beads. After extensive washing the binding of MED25 ACID  
705 to GST, GST-NS1 and GST-NS1  $\alpha 3$  helix was analysed by SDS-PAGE and Coomassie blue  
706 staining. **(B)** Band intensities were quantified with J imager.

707

708 **Figure 4: Interaction of NS1  $\alpha 3$  peptide with MED25 ACID followed by NMR. (A)** Overlay  
709 of 2D  $^1\text{H}$ - $^{15}\text{N}$  HSQC spectra acquired during a titration of 225  $\mu\text{M}$   $^{15}\text{N}$ -labeled MED25 ACID  
710 with increasing amounts of NS1  $\alpha 3$  peptide. The reference spectrum without peptide is shown  
711 in red. The titration endpoint at a peptide:protein molar ratio  $r = 2.3$  is in medium blue.  
712 Intermediate titration points at  $r = 0.1, 0.2, 0.4, 0.6, 0.85, 1.1, 1.4,$  and  $1.7$  are colour coded



713 from dark orange to dark blue. Arrows show the titration direction. **(B)** Combined  $^1\text{H}$  and  $^{15}\text{N}$   
714 amide chemical shift perturbations ( $\Delta\delta_{\text{HN}}$ ) are stack plotted as a function of the residue number  
715 in the MED25 ACID construct for  $r = 1.1$  (black bars) and  $r = 2.3$  (empty bars). The bars at  $r =$   
716  $2.3$  were cut for residues Thr460 and Leu513 ( $\Delta\delta_{\text{HN}} > 0.3$  ppm). The mean value and mean  
717 plus one and two standard deviations (SD) for  $r = 1.1$  are indicated by broken lines. **(C)**  
718 Chemical shift perturbations at  $r = 1.1$  are mapped onto the structure of MED25 ACID (pdb  
719 2xnf). Amide nitrogen atoms are drawn as spheres in green for residues with  $\Delta\delta_{\text{HN}} \geq$   
720  $\text{mean} + 2 \times \text{SD}$  and in yellow when  $\Delta\delta_{\text{HN}} \geq \text{mean} + \text{SD}$ . The two views, corresponding to the H2  
721 and H1 faces of MED25 ACID, are rotated by  $180^\circ$ . **(D)** Several signals are broadened at  
722 intermediate titration points due to an intermediate exchange regime, as exemplified by  
723 Gly524 in the inset shown on the  $^1\text{H}$ - $^{15}\text{N}$  HSQC spectra in (A). Residues in intermediate  
724 exchange regime are highlighted in orange.

725

726 **Figure 5: Binding modes of NS1  $\alpha 3$  peptide to H1 and H2 faces of MED25 ACID. (A)**  
727 Three types of chemical shift perturbation trajectories, shown for selected residues, were  
728 observed during the  $^1\text{H}$ - $^{15}\text{N}$  HSQC titration of  $^{15}\text{N}$ -MED25 ACID by the NS1  $\alpha 3$  peptide. Arrows  
729 show the titration direction. The colour is varied from red to medium blue for molar  
730 peptide:protein ratios  $r = 0$  to  $2.3$ , with titration points at  $r = 0.1, 0.2, 0.3, 0.4, 0.6, 0.85, 1.1,$   
731  $1.4,$  and  $1.7$ . (B) The  $^{15}\text{N}$  or  $^1\text{H}$  chemical shift dimensions of the titration curves, shown in A,  
732 were fitted with a single binding site model, assuming fast chemical exchange. Experimental  
733 points are represented with solid symbols and the fitted curve in broken lines. The apparent  
734 dissociation constants  $K_d$  obtained from each fit are indicated. **(C)** Residues with high chemical  
735 shift perturbations are mapped onto the structure of MED25 ACID (pdb 2xnf) by representing  
736 their amide nitrogen in a sphere colour coded according to their binding mode. Residues with  
737 higher affinity, i.e. with apparent  $K_d$  values ranging from  $7$ - $40 \mu\text{M}$ , are indicated in red.  
738 Residues with high chemical shift perturbations, but for which saturation was not achieved at  
739  $r = 2.3$  are shown in blue. Residues that report on both binding events are represented in  
740 magenta. The three views are rotated by  $90^\circ$ .

741

742 **Figure 6: NS1 competes with ATF6 $\alpha$  for binding to MED25. (A)** Sequence alignment of  
743 NS1  $\alpha$ 3 with transactivator domains of transcription factors p53, VP16 and ATF6 $\alpha$ . The letter  
744  $\Phi$  indicates hydrophobic or aromatic amino acids. Bold letters indicate residues that form an  
745  $\alpha$ -helix either in the unbound state or when bound to MED25 ACID (18, 26, 31, 43). Underlined  
746 letters indicate residues that are critical for the interaction of NS1  $\alpha$ 3, p53TAD2 and ATF6 $\alpha$   
747 with MED25 ACID or critical for transcription in yeast for VP16H2. **(B)** SDS-PAGE and  
748 Coomassie blue staining of purified recombinant GST, GST- ATF6 $\alpha$ TAD, MED25 ACID and  
749 NS1 protein. **(C)** GST or GST-ATF6 $\alpha$ TAD were expressed in *E. coli* BL21(DE3), purified on  
750 glutathione-Sepharose beads, and incubated in the presence of MED25 ACID. After extensive  
751 washing the binding of MED25 ACID to GST and GST-ATF6 $\alpha$ TAD was determined by SDS-  
752 PAGE and Coomassie bleu staining. **(D)** GST-ATF6 $\alpha$ TAD protein was purified on glutathione-  
753 Sepharose beads and incubated in the presence of MED25 ACID (30 $\mu$ M) or MED25 ACID  
754 with increasing concentration of NS1 as indicated. After incubation supernatants were  
755 collected; beads were extensively washed and the binding of MED25 ACID to ATF6 $\alpha$ TAD and  
756 the proteins in the supernatants were analysed by SDS-PAGE and Coomassie blue staining  
757 (upper and lower gels respectively).

758

Fig. 1

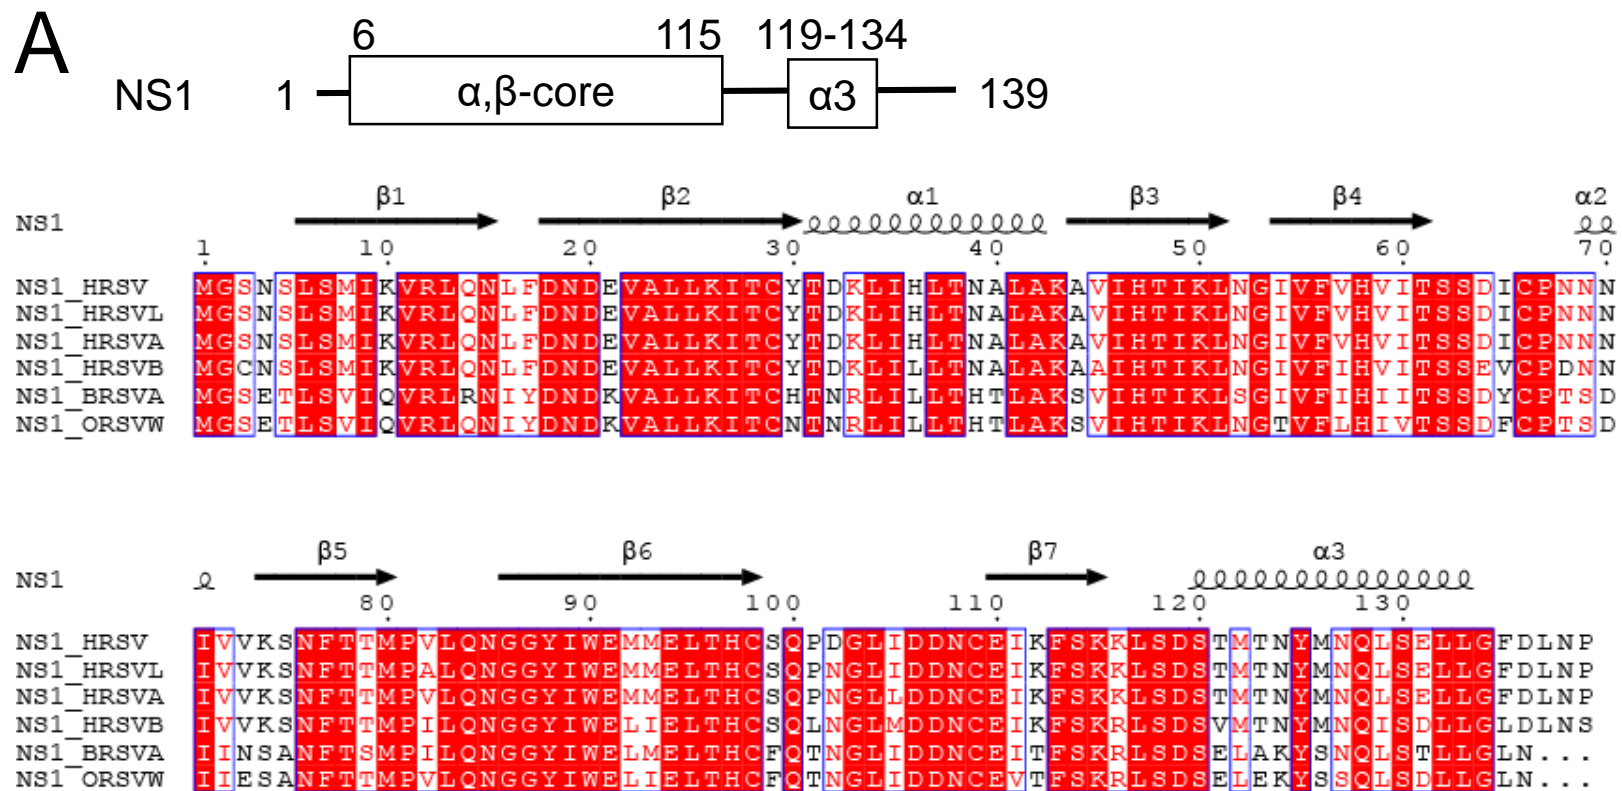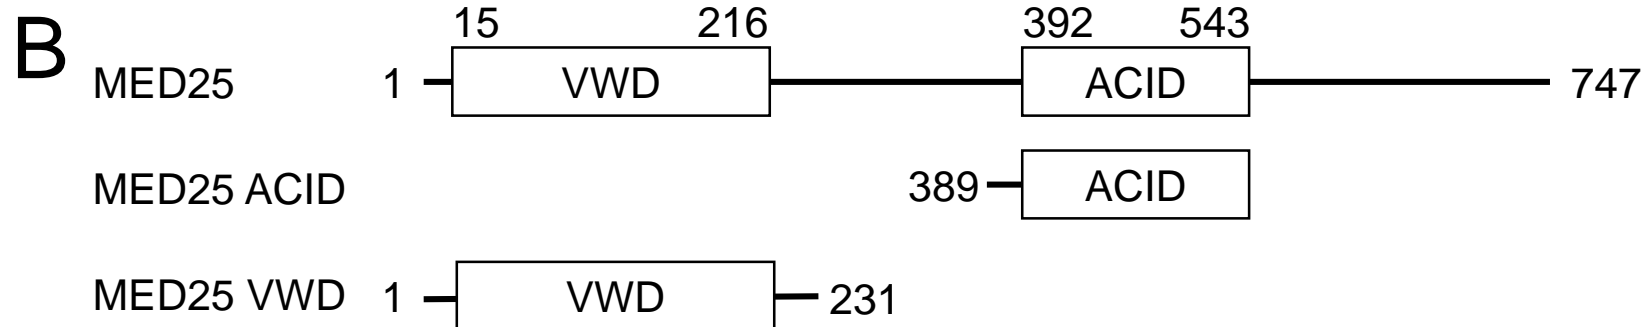

# Fig. 2

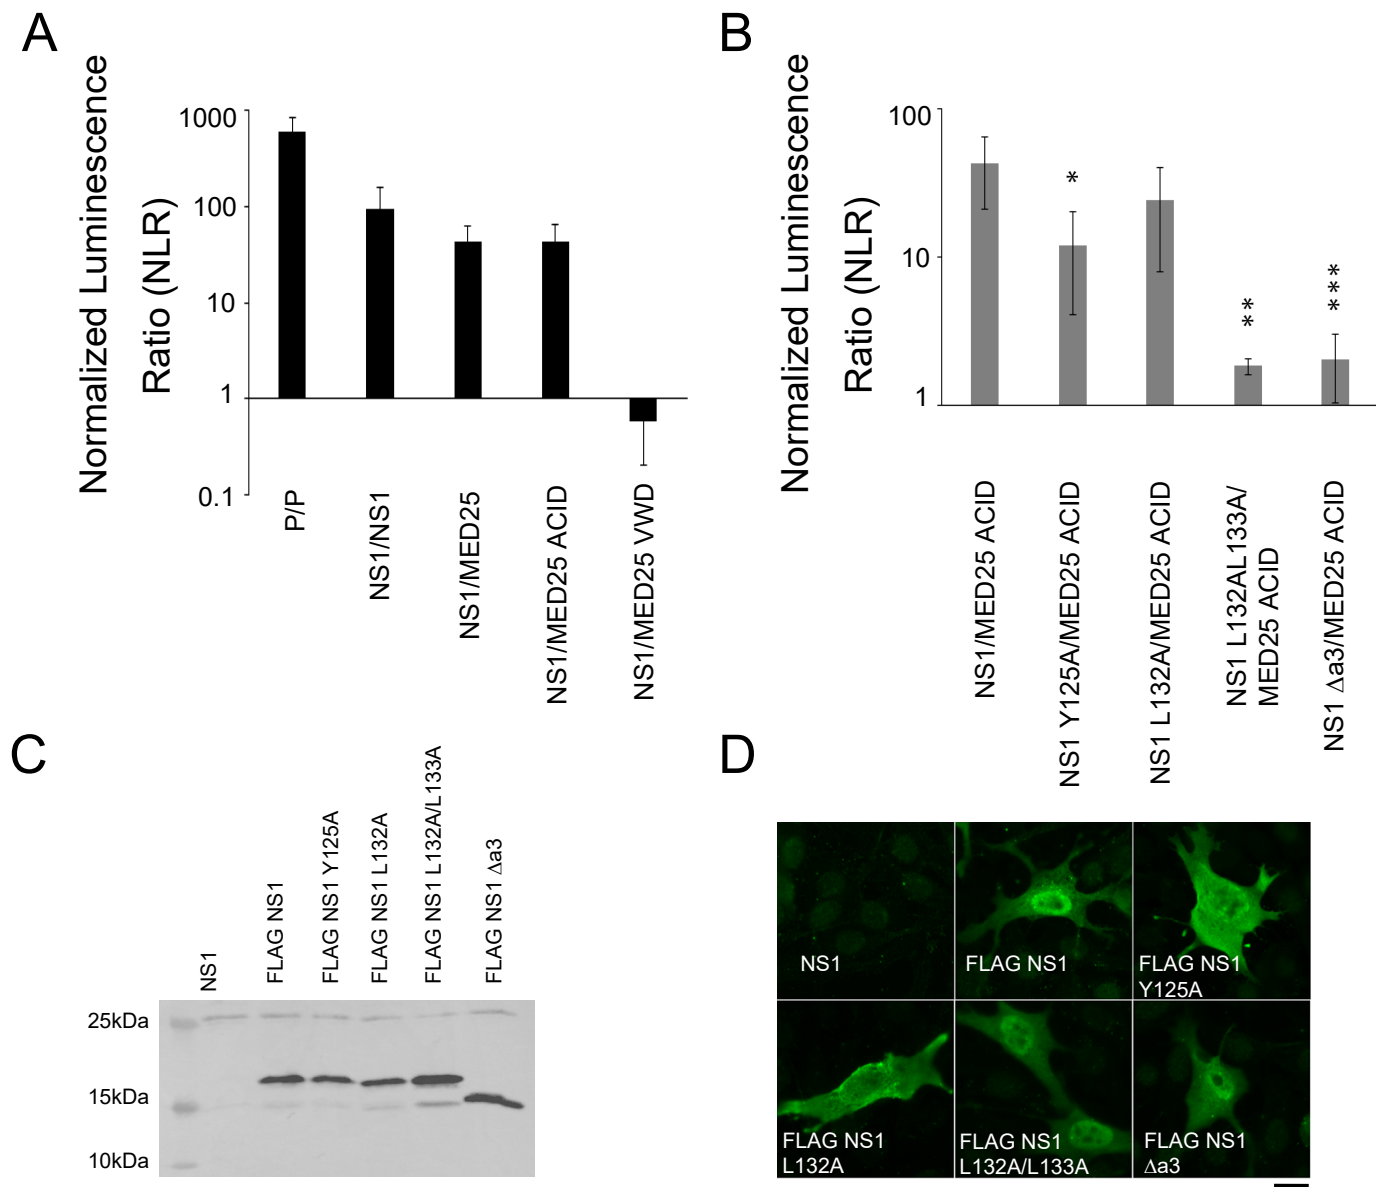

# Fig. 3

## A.

|                    |   |   |   |
|--------------------|---|---|---|
| GST NS1 $\alpha$ 3 | - | - | + |
| GST NS1            | - | + | - |
| GST                | + | - | - |
| MED25 ACID         | + | + | + |

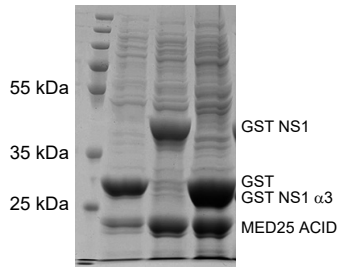

## B.

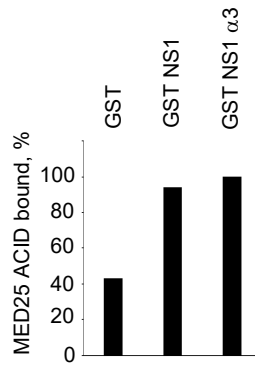

Fig. 4

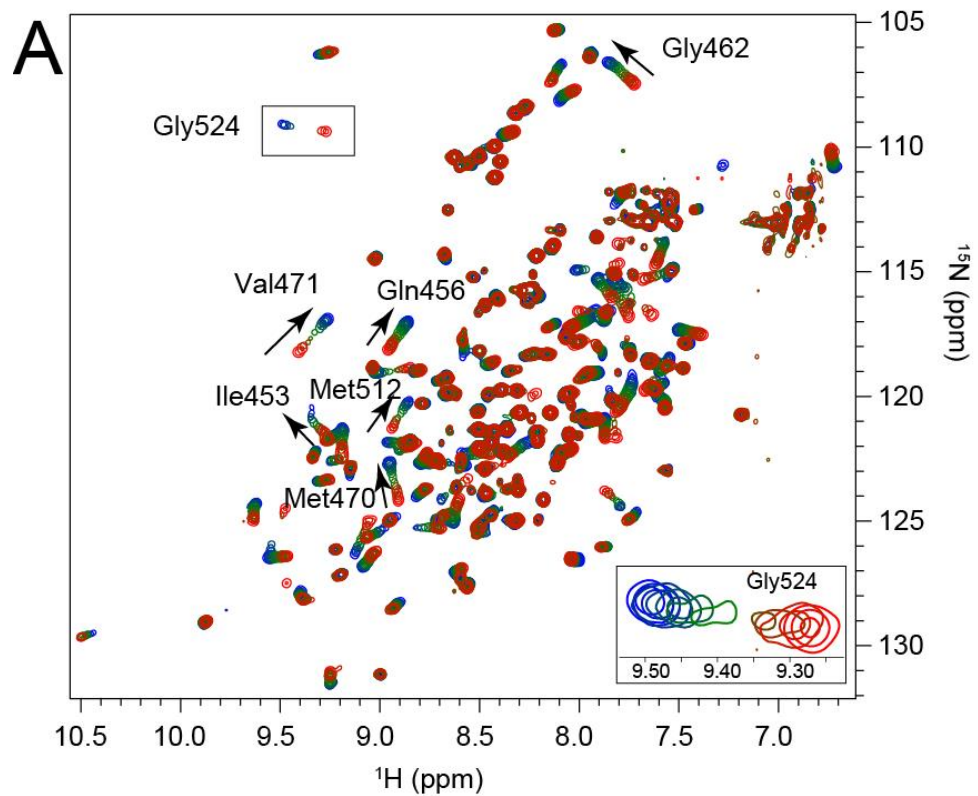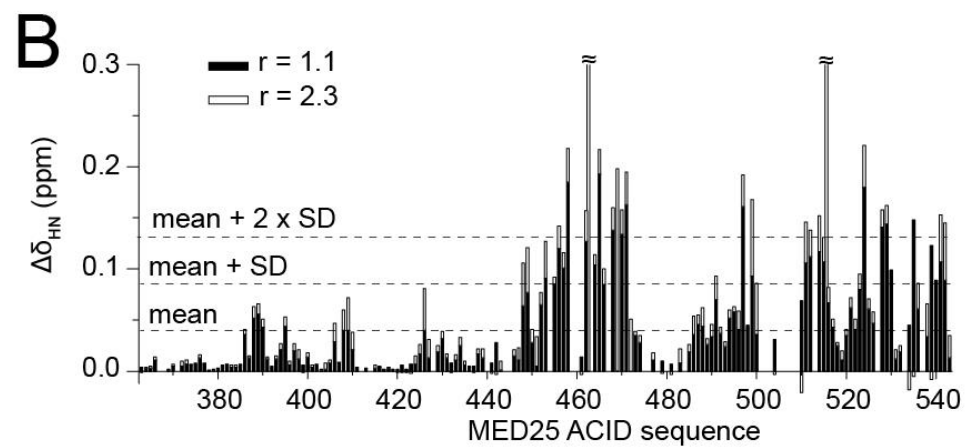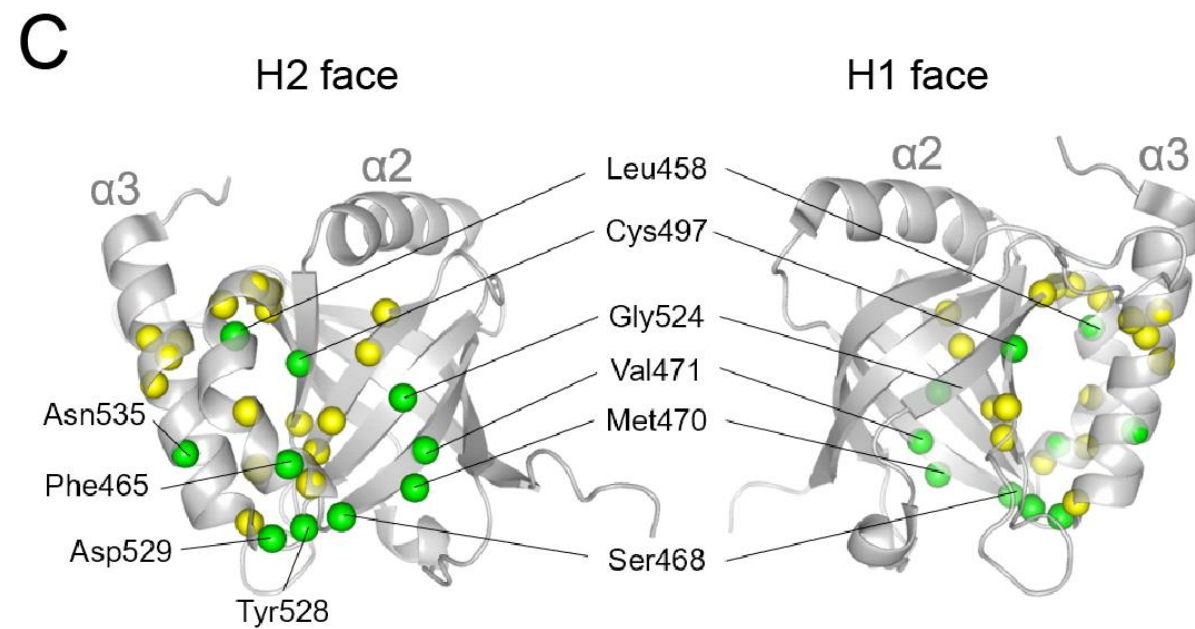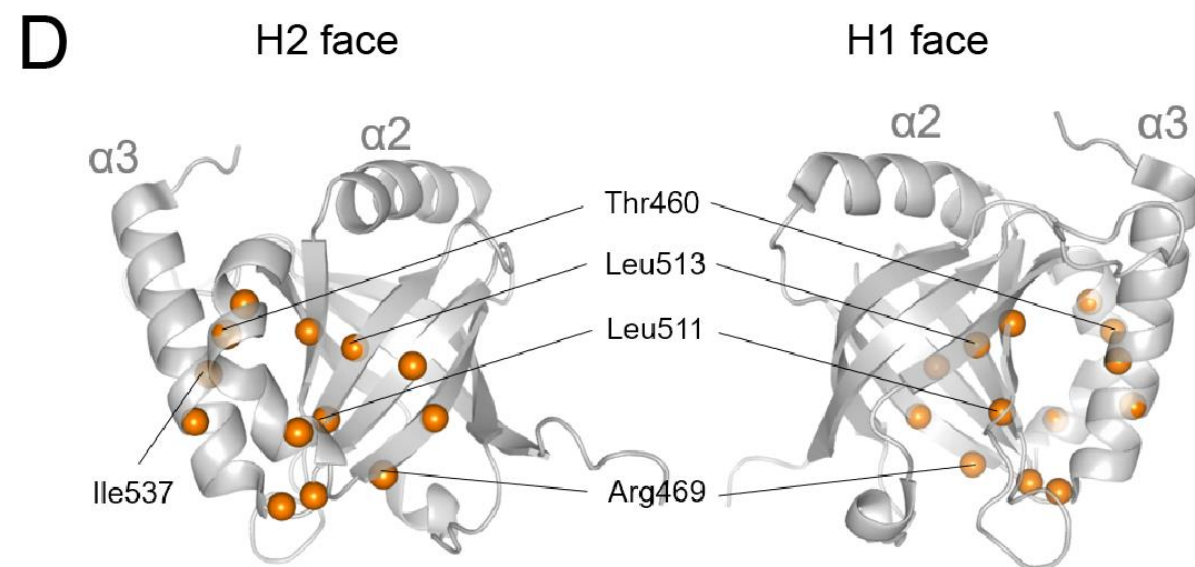

Fig. 5

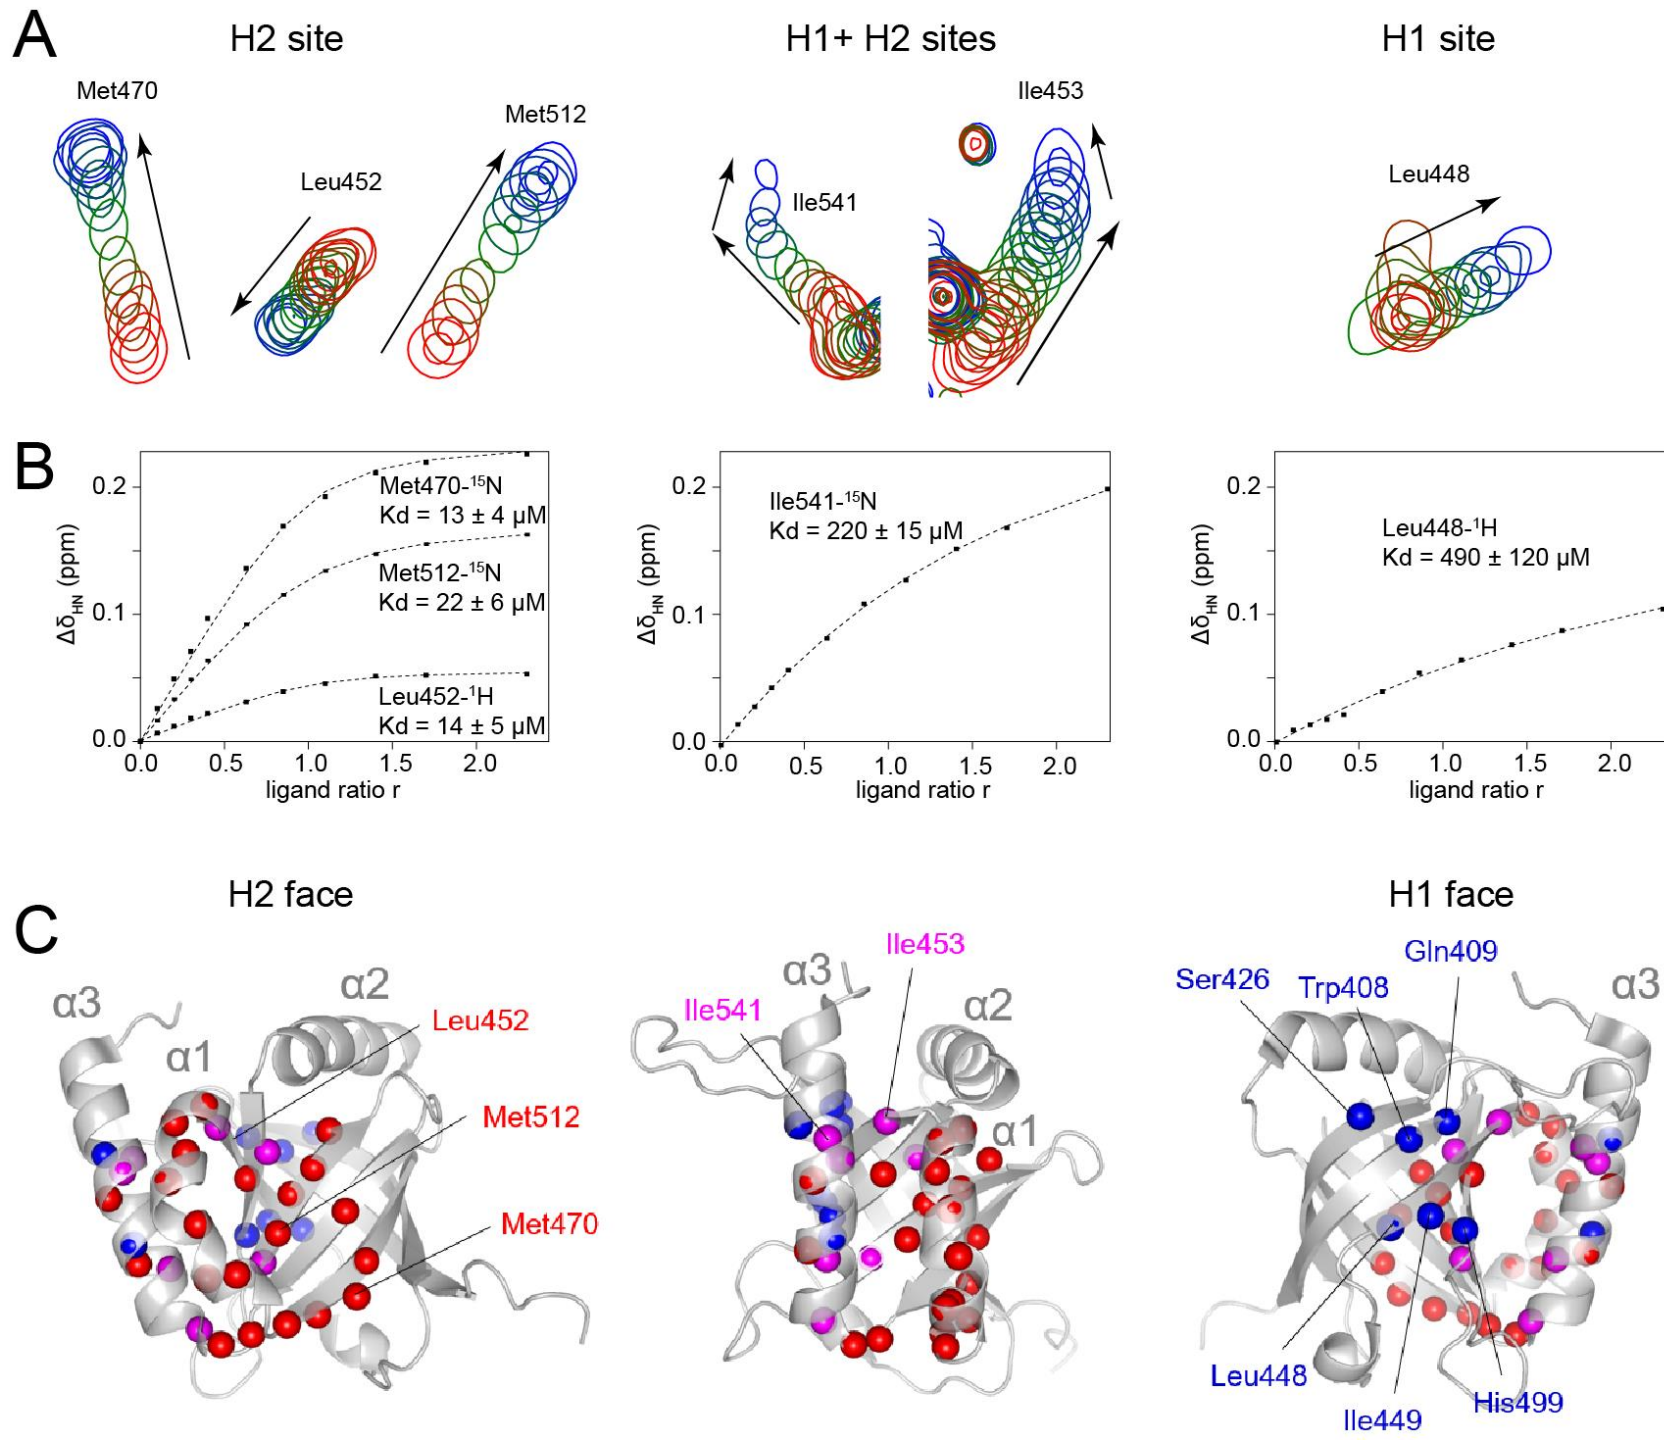

# Fig. 6

## A.

|                |     |   |   |   |   |   |   |   |                                                               |                                                               |                                                               |                                                               |                                                               |   |   |                                                               |                                                               |   |                                                               |                                                               |   |   |   |     |    |   |   |     |
|----------------|-----|---|---|---|---|---|---|---|---------------------------------------------------------------|---------------------------------------------------------------|---------------------------------------------------------------|---------------------------------------------------------------|---------------------------------------------------------------|---|---|---------------------------------------------------------------|---------------------------------------------------------------|---|---------------------------------------------------------------|---------------------------------------------------------------|---|---|---|-----|----|---|---|-----|
| NS1 $\alpha$ 3 | 118 | S | D | S | T | M | T | N | <span style="border: 1px solid red; padding: 0 2px;">Y</span> | M                                                             | N                                                             | Q                                                             | <span style="border: 1px solid red; padding: 0 2px;">L</span> | S | E | <span style="border: 1px solid red; padding: 0 2px;">L</span> | <span style="border: 1px solid red; padding: 0 2px;">L</span> | G | F                                                             | D                                                             | L | N | P | 134 |    |   |   |     |
| P53TAD2        | 39  | A | M | D | D | L | M | L | S                                                             | P                                                             | D                                                             | D                                                             | <span style="border: 1px solid red; padding: 0 2px;">I</span> | E | Q | W                                                             | <span style="border: 1px solid red; padding: 0 2px;">F</span> | T | E                                                             | D                                                             |   |   |   |     | 57 |   |   |     |
| VP16TAD2       | 465 | Y | G | A | L | D | M | A | <span style="border: 1px solid red; padding: 0 2px;">D</span> | <span style="border: 1px solid red; padding: 0 2px;">E</span> | <span style="border: 1px solid red; padding: 0 2px;">E</span> | <span style="border: 1px solid red; padding: 0 2px;">E</span> | <span style="border: 1px solid red; padding: 0 2px;">E</span> | Q | M | <span style="border: 1px solid red; padding: 0 2px;">E</span> | T                                                             | D | A                                                             | <span style="border: 1px solid red; padding: 0 2px;">L</span> | G | I | D | E   | Y  | G | G | 490 |
| ATF6 $\alpha$  | 47  | E | A | A | N | E | T | Y | E                                                             | N                                                             | N                                                             | <span style="border: 1px solid red; padding: 0 2px;">E</span> | D                                                             | N | L | D                                                             | <span style="border: 1px solid red; padding: 0 2px;">E</span> | D | <span style="border: 1px solid red; padding: 0 2px;">L</span> | D                                                             | L |   |   |     |    |   |   | 66  |

## B.

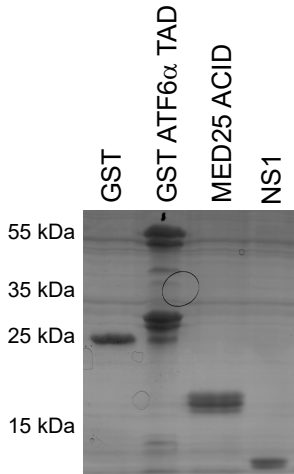

## C.

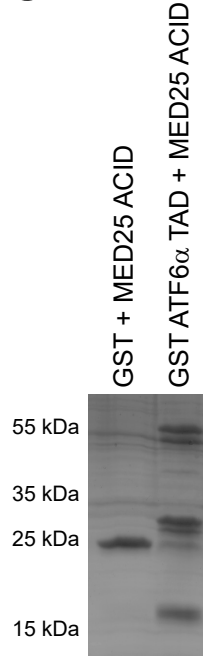

## D.

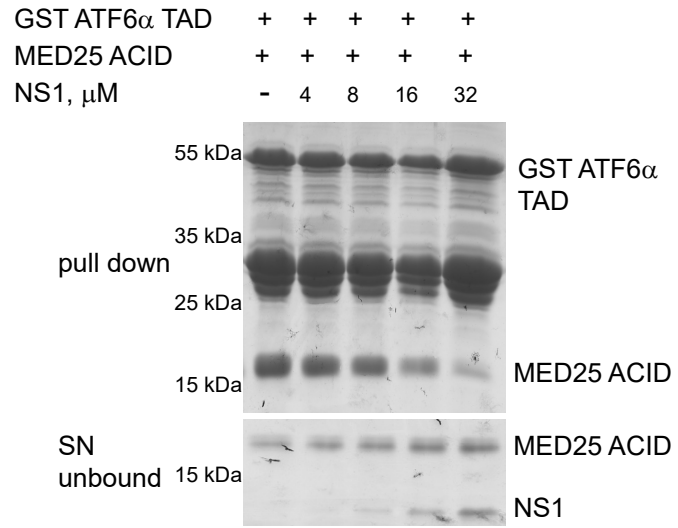

Source: https://www.biorxiv.org/content/10.1101/2021.11.19.469356v1.full.pdf
